# Supplementary material for: Physiological and transcriptomic analyses reveal the roles of secondary metabolism in the adaptive responses of Stylosanthes to manganese toxicity
Source: PubMed Central journal article supplement (PMC7713027; doi:10.1186/s12864-020-07279-2), 2020-12-03
Supplement: 12864_2020_7279_MOESM1_ESM.pdf [file 12864_2020_7279_MOESM1_ESM.pdf]

## Additional file 1: Figure S1

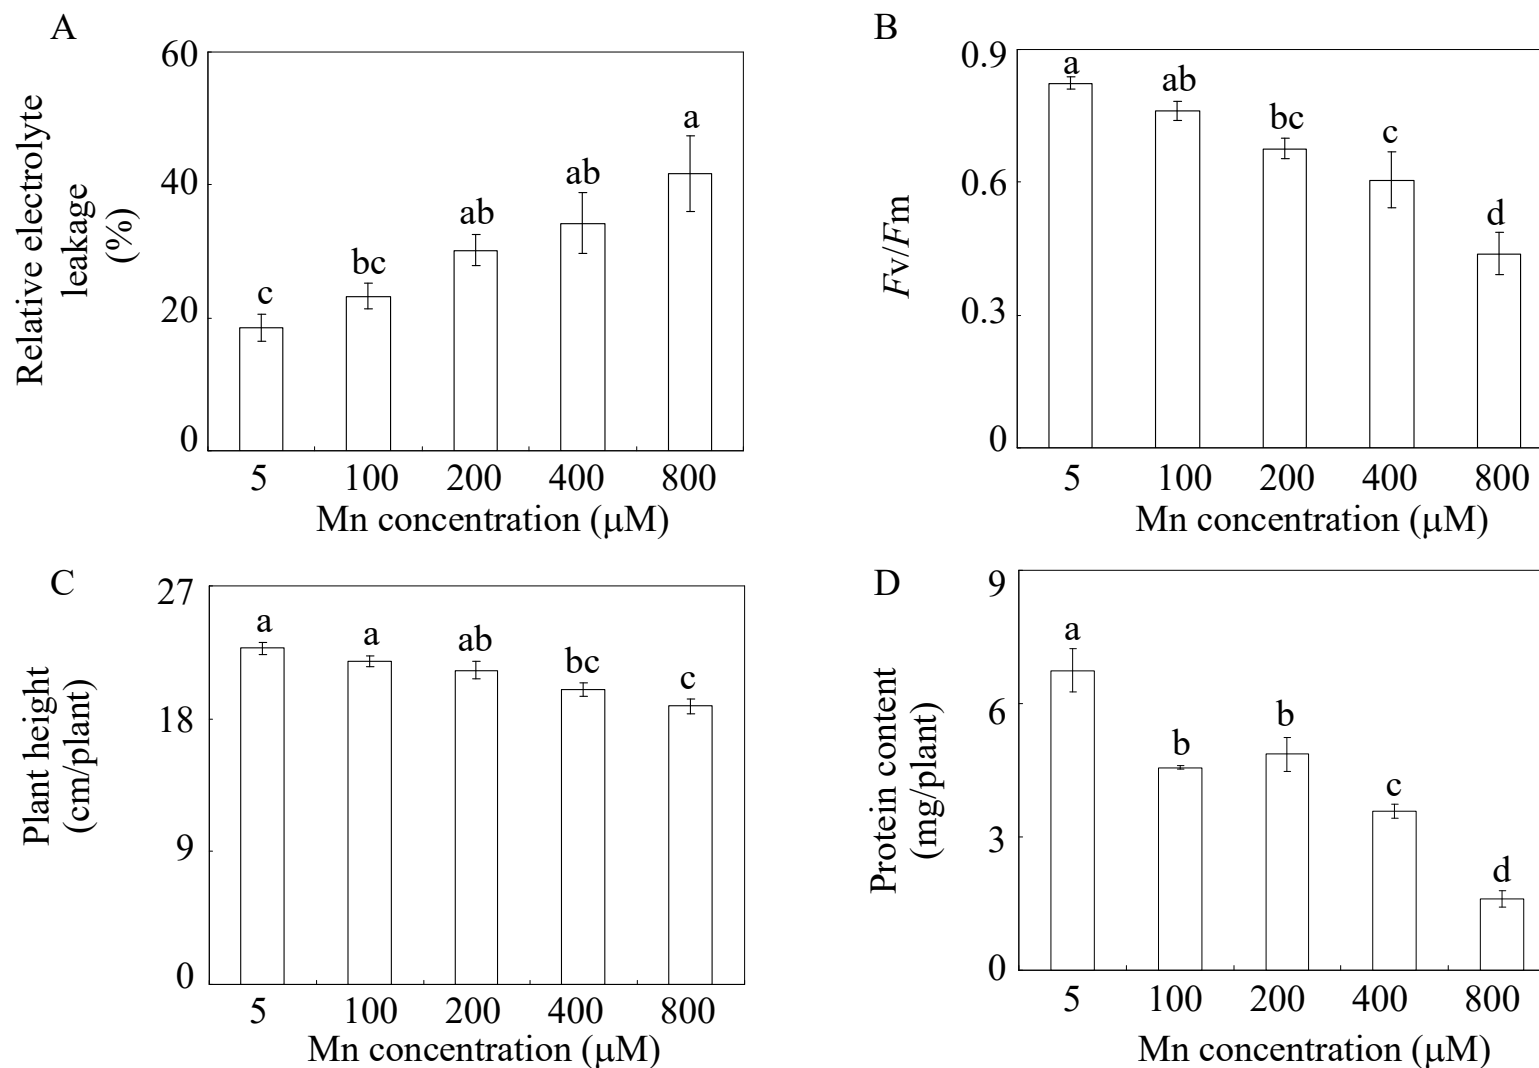

Additional file 1: Figure S1. Effects of different Mn treatments on relative electrolyte leakage,  $F_v/F_m$ , plant height and total protein content. (a) Relative electrolyte leakage. (b)  $F_v/F_m$  values. (c) Plant height. (d) Total protein content. Thirty-day-old stylo plants were treated with 5, 100, 200, 400 and 800  $\mu\text{M}$   $\text{MnSO}_4$  for 10 d. Values are the mean of three replicates with standard error bars. Different letters represent significant differences at  $P < 0.05$ .
